# Supplementary material for: Sclareol prevents ovariectomy-induced bone loss in vivo and inhibits osteoclastogenesis in vitro via suppressing NF-κB and MAPK/ERK signaling pathways
Source: Royal Society of Chemistry journal article supplement (doi:10.1039/c9fo00206e), 2019-01-01
Supplement: c9fo00206e3.pdf [file c9fo00206e3.pdf]

### **Supplemental Figure Legends**

**Supplemental Figure 1.** Sclareol did not affect osteoblastic differentiation and mineralization in vitro. (A) Representative images of ALP staining of primary osteoblasts in different groups (day 7). ALP-positive cells were stained blue. (B) Representative images of alizarin red staining in different groups (day 21). The calcium nodules produced by osteoblasts were stained red.
