# Supplementary figures and images for: Sclareol prevents ovariectomy-induced bone loss in vivo and inhibits osteoclastogenesis in vitro via suppressing NF-κB and MAPK/ERK signaling pathways
Source: Royal Society of Chemistry journal article supplement (doi:10.1039/c9fo00206e), 2019-01-01

# $\beta$ -Gly + A.A + DXM

**A**

**ALP  
staining  
(7D)**

**Control**

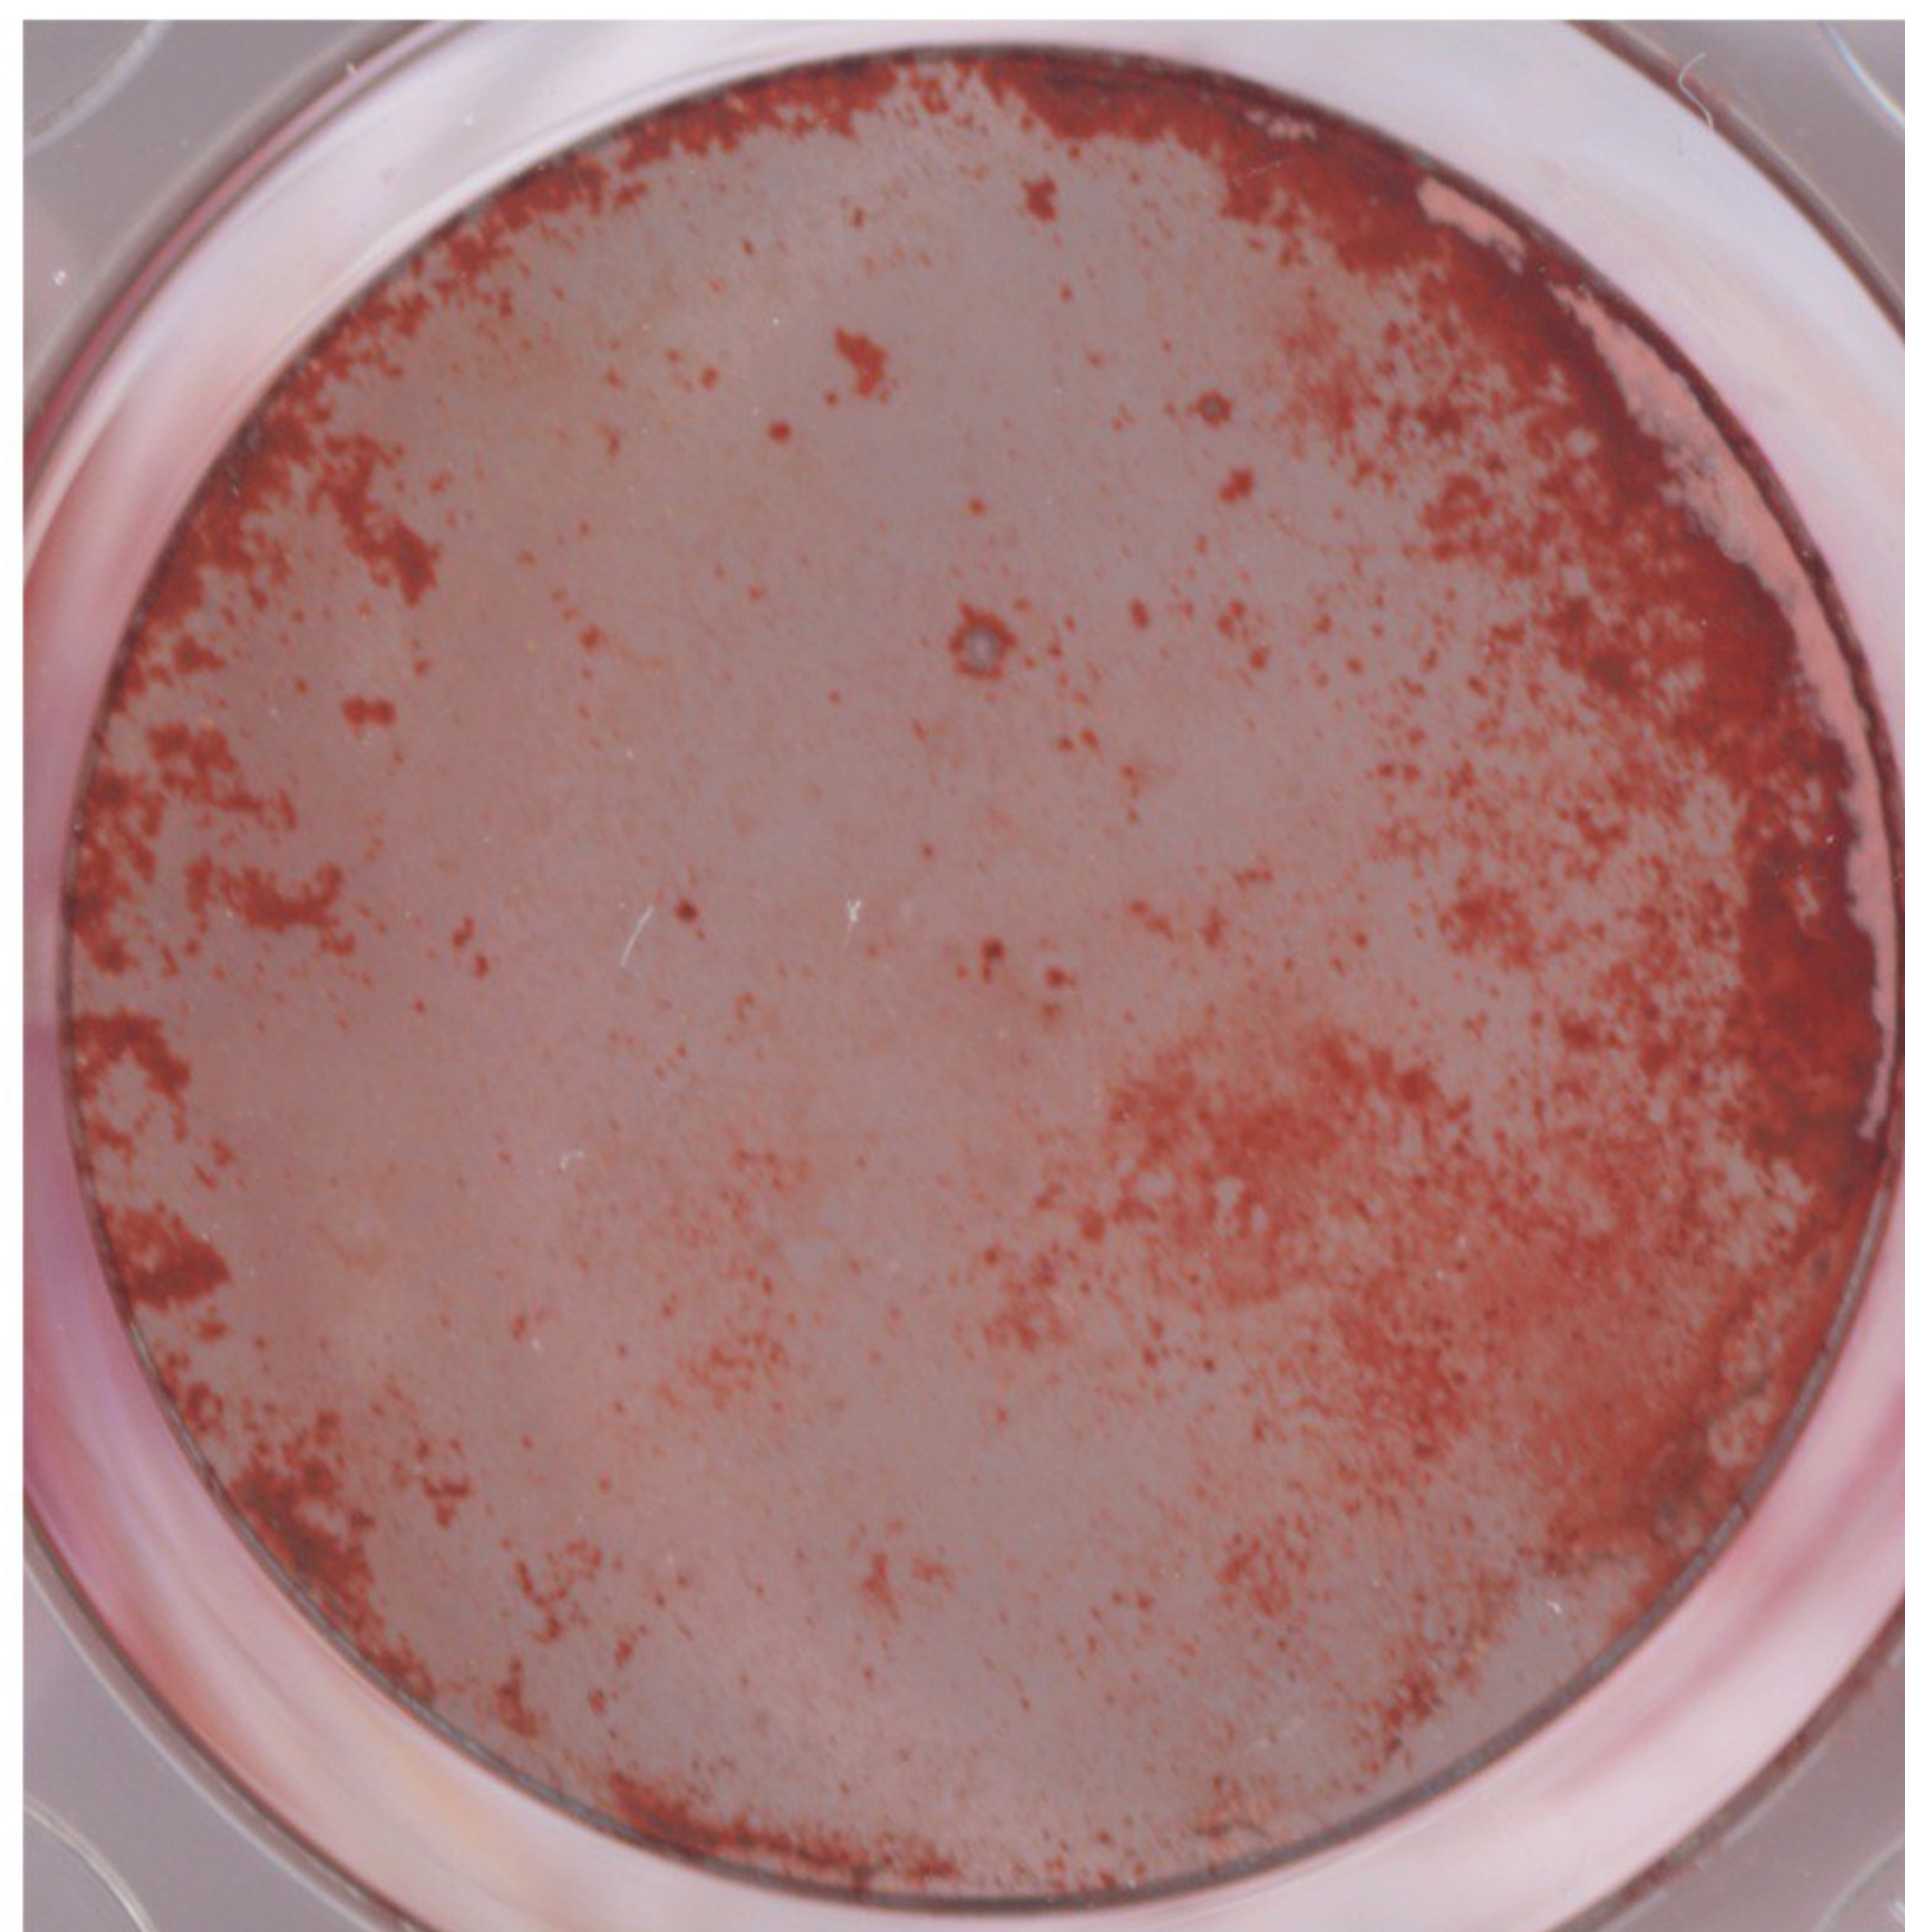

**Sclareol (5 $\mu$ M)**

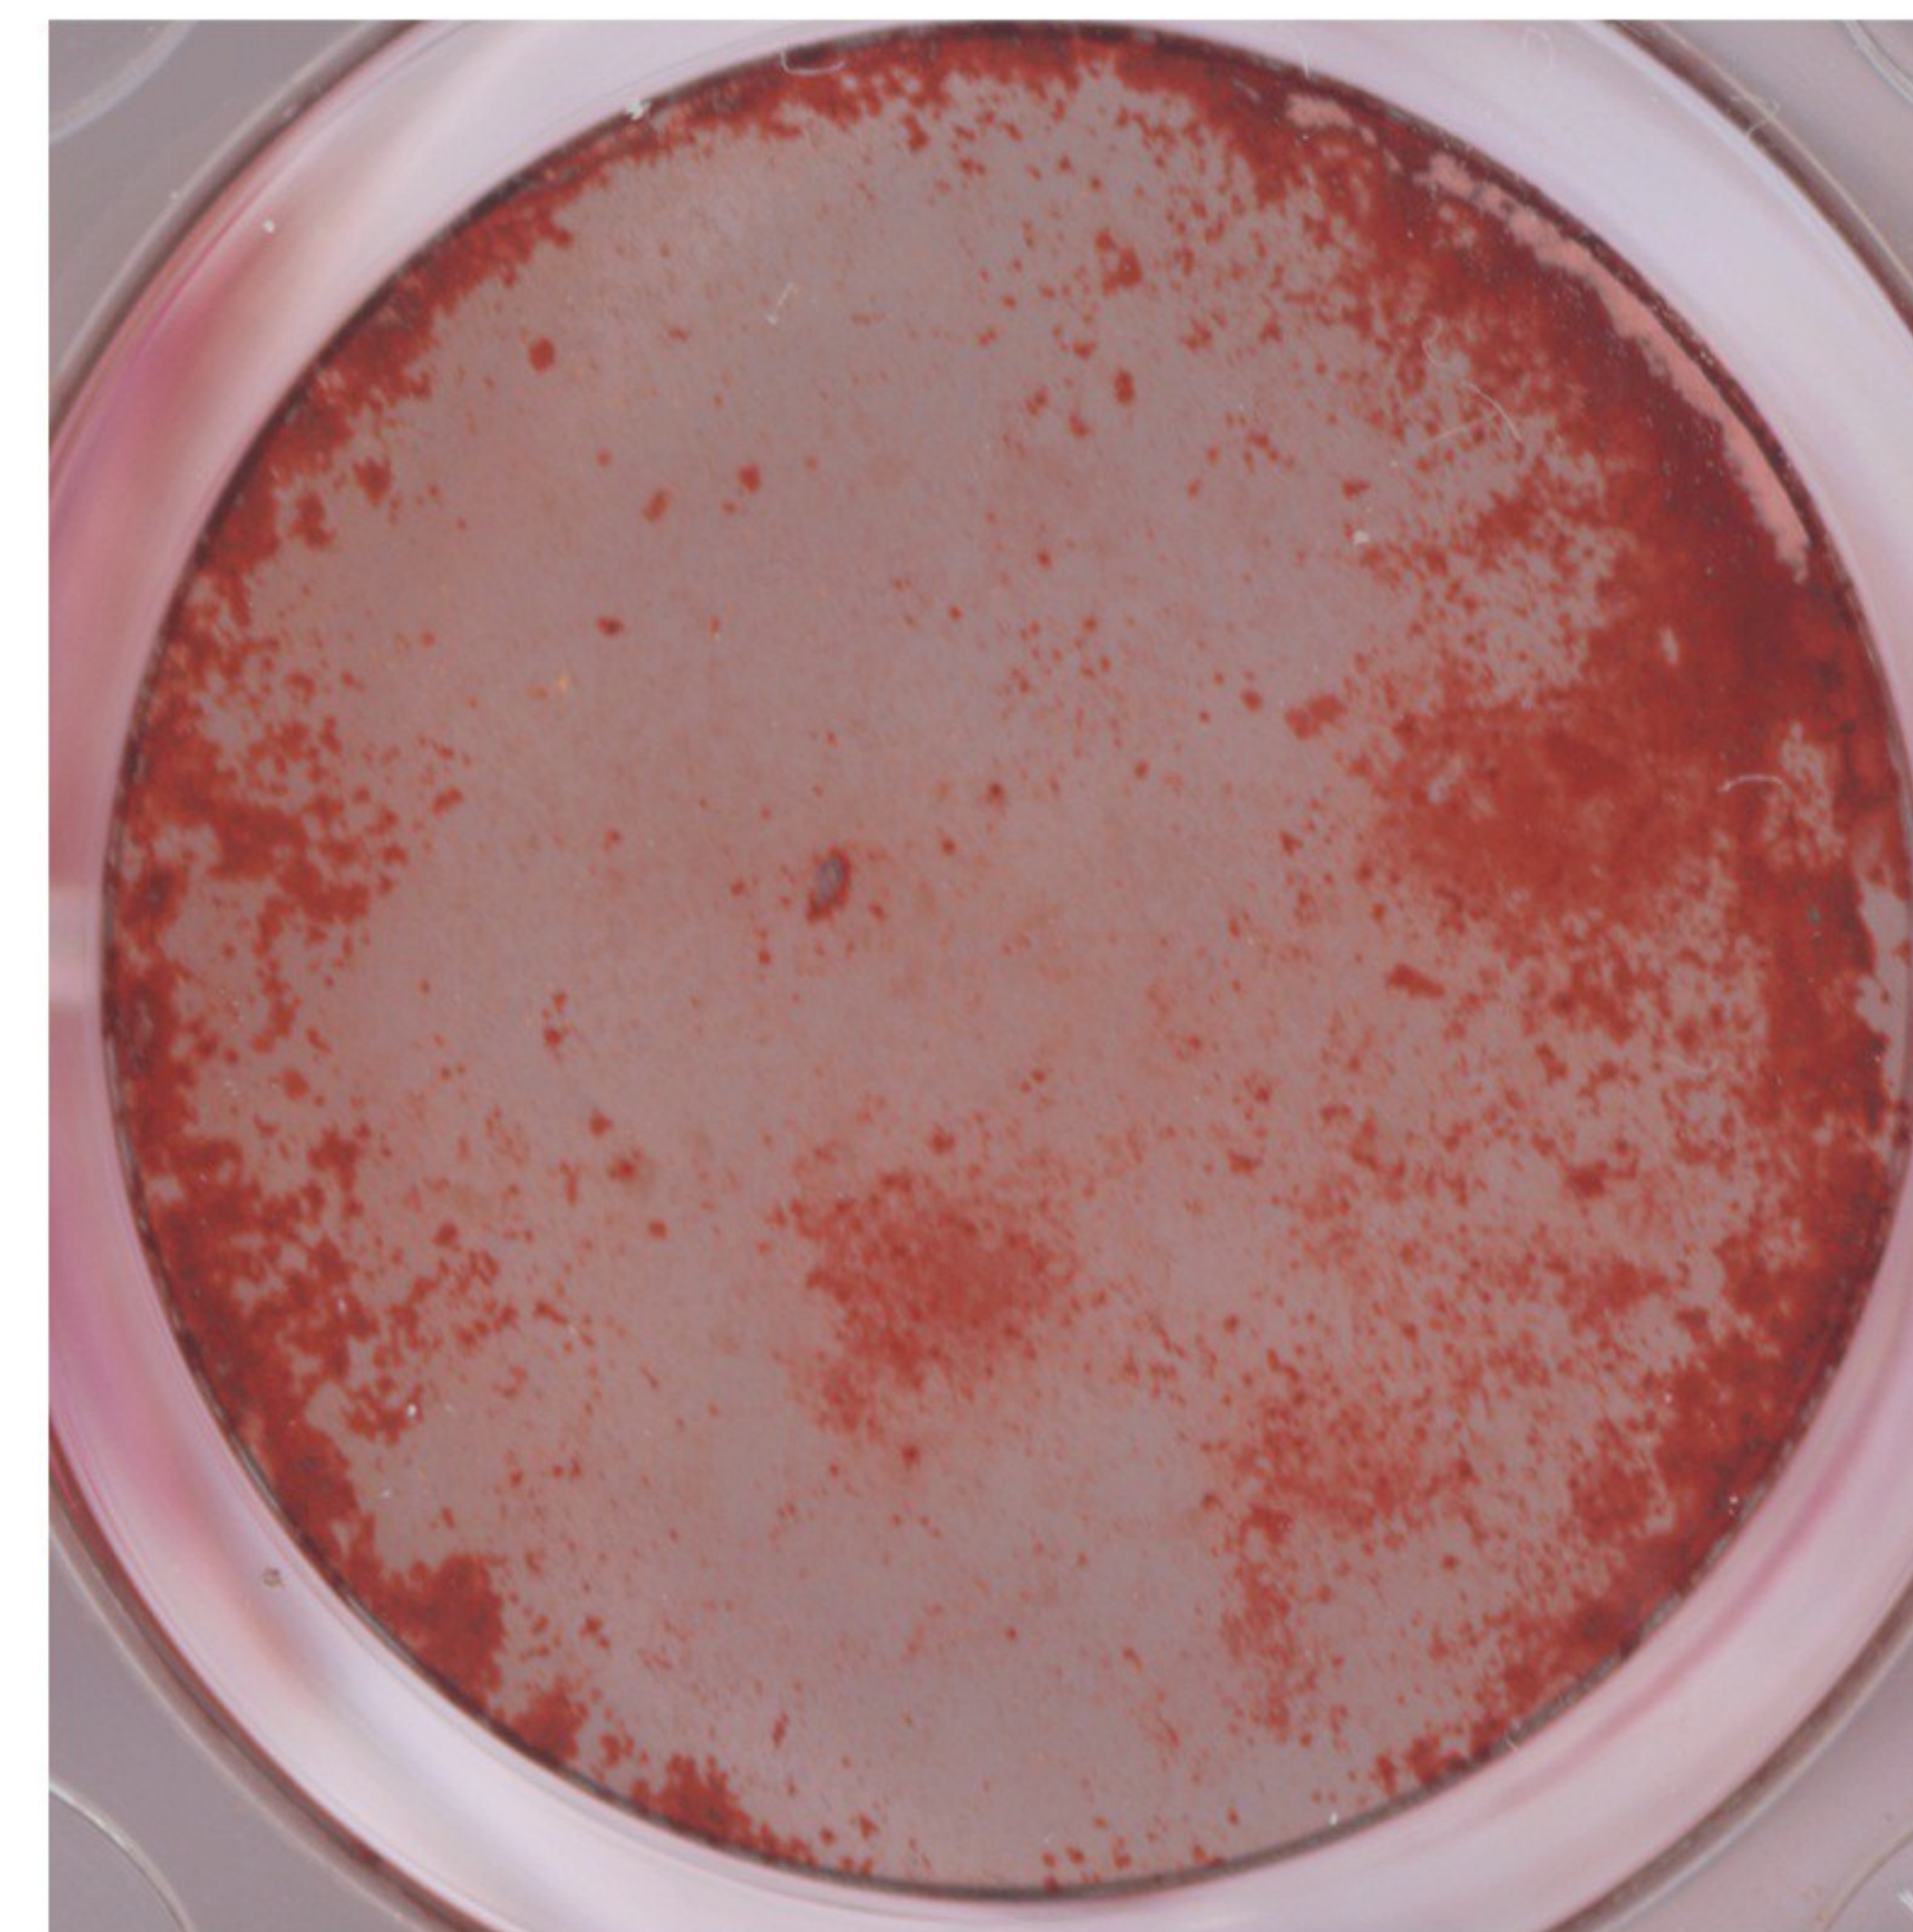

**Sclareol (10 $\mu$ M)**

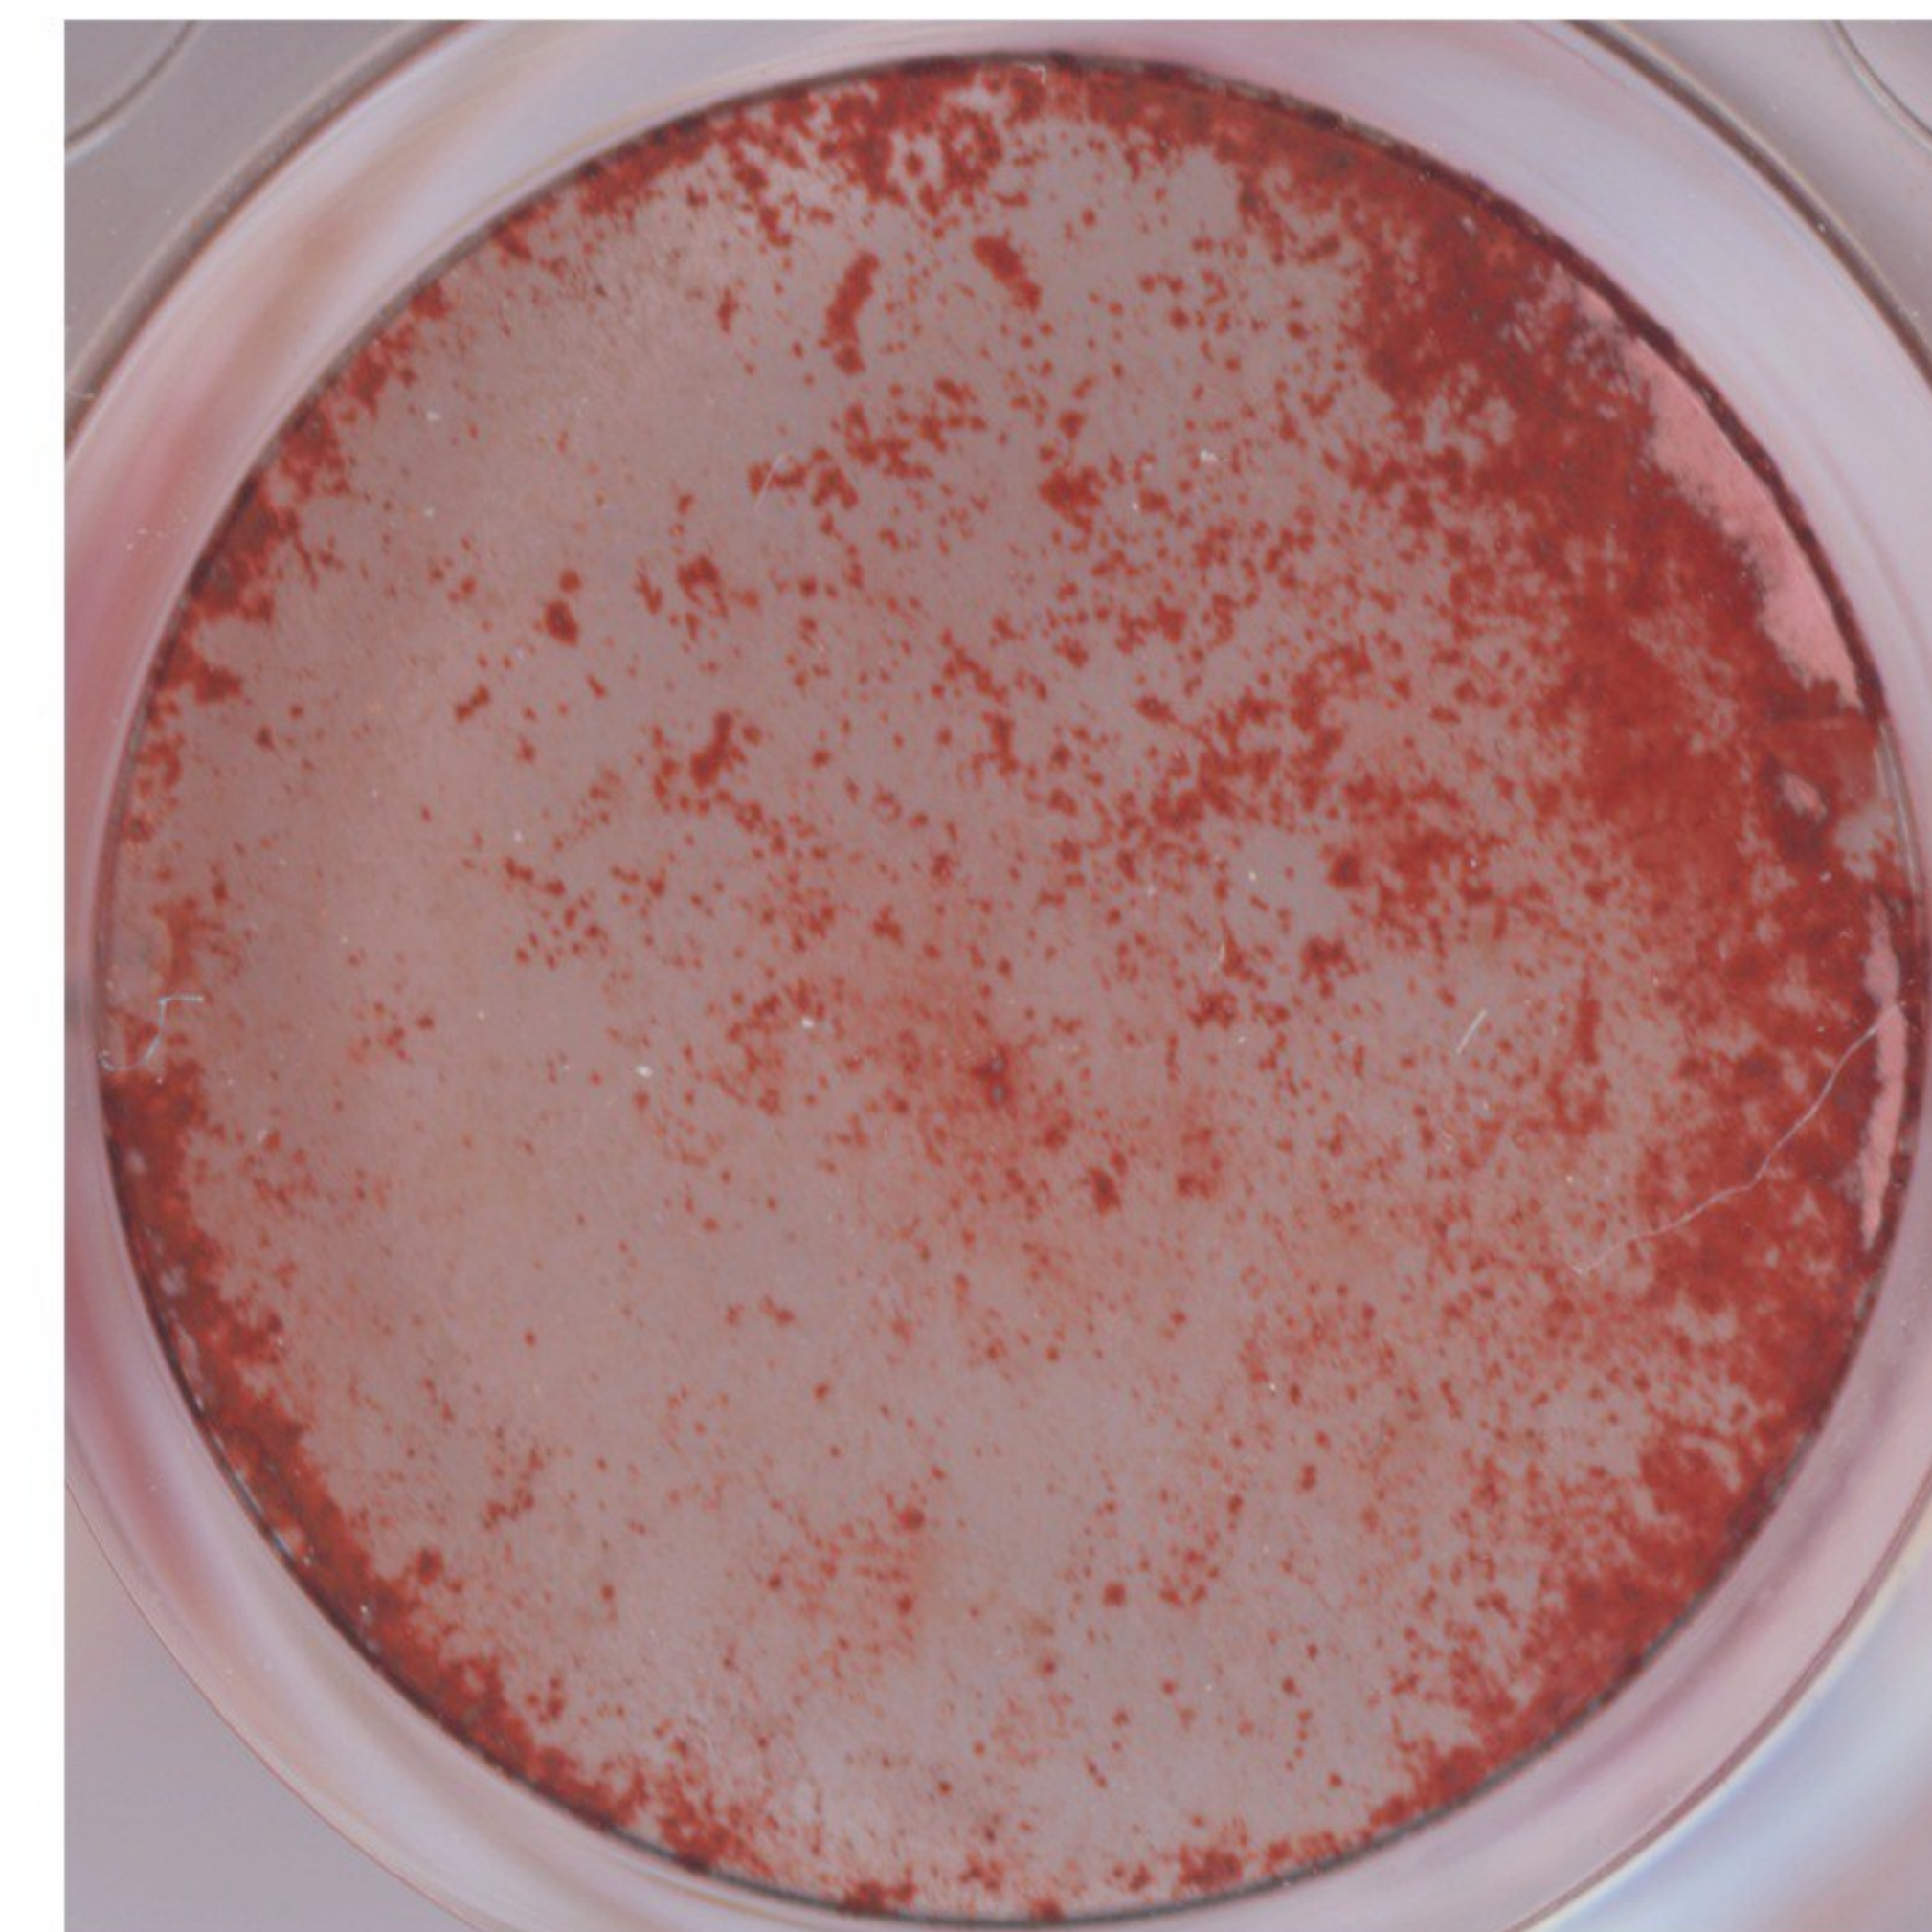

**B**

**Alizarin  
Red  
staining  
(21D)**

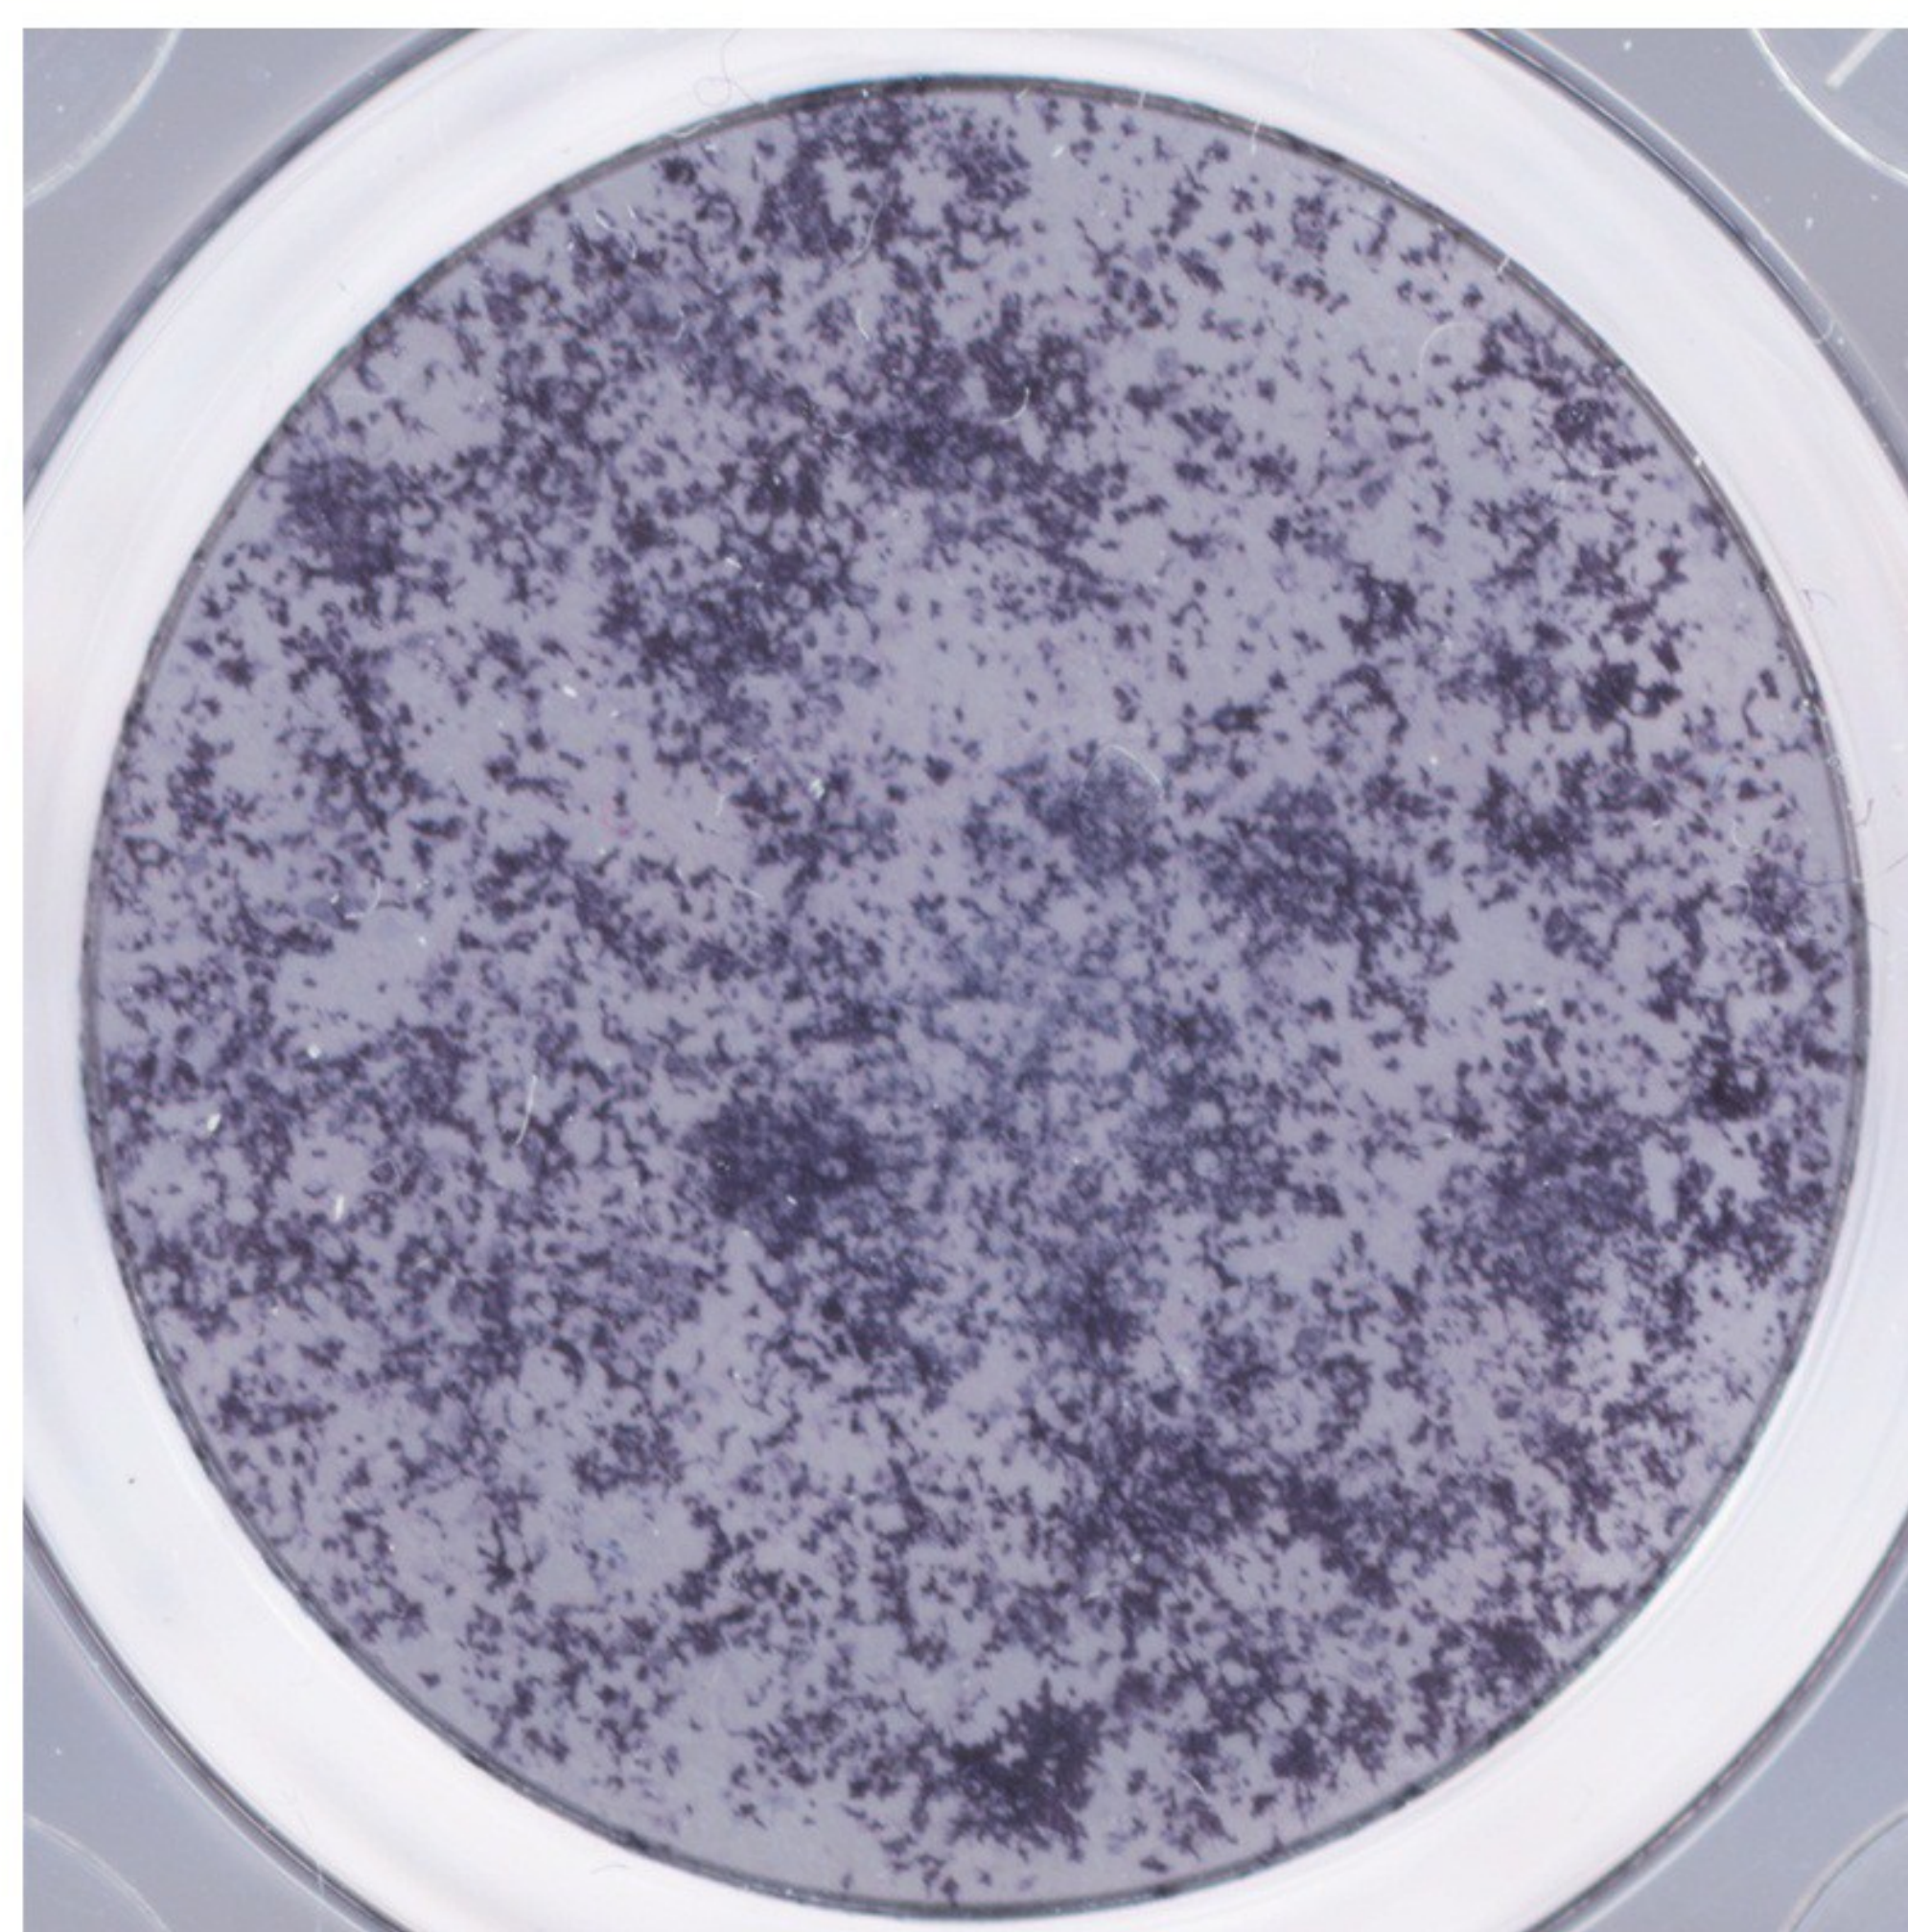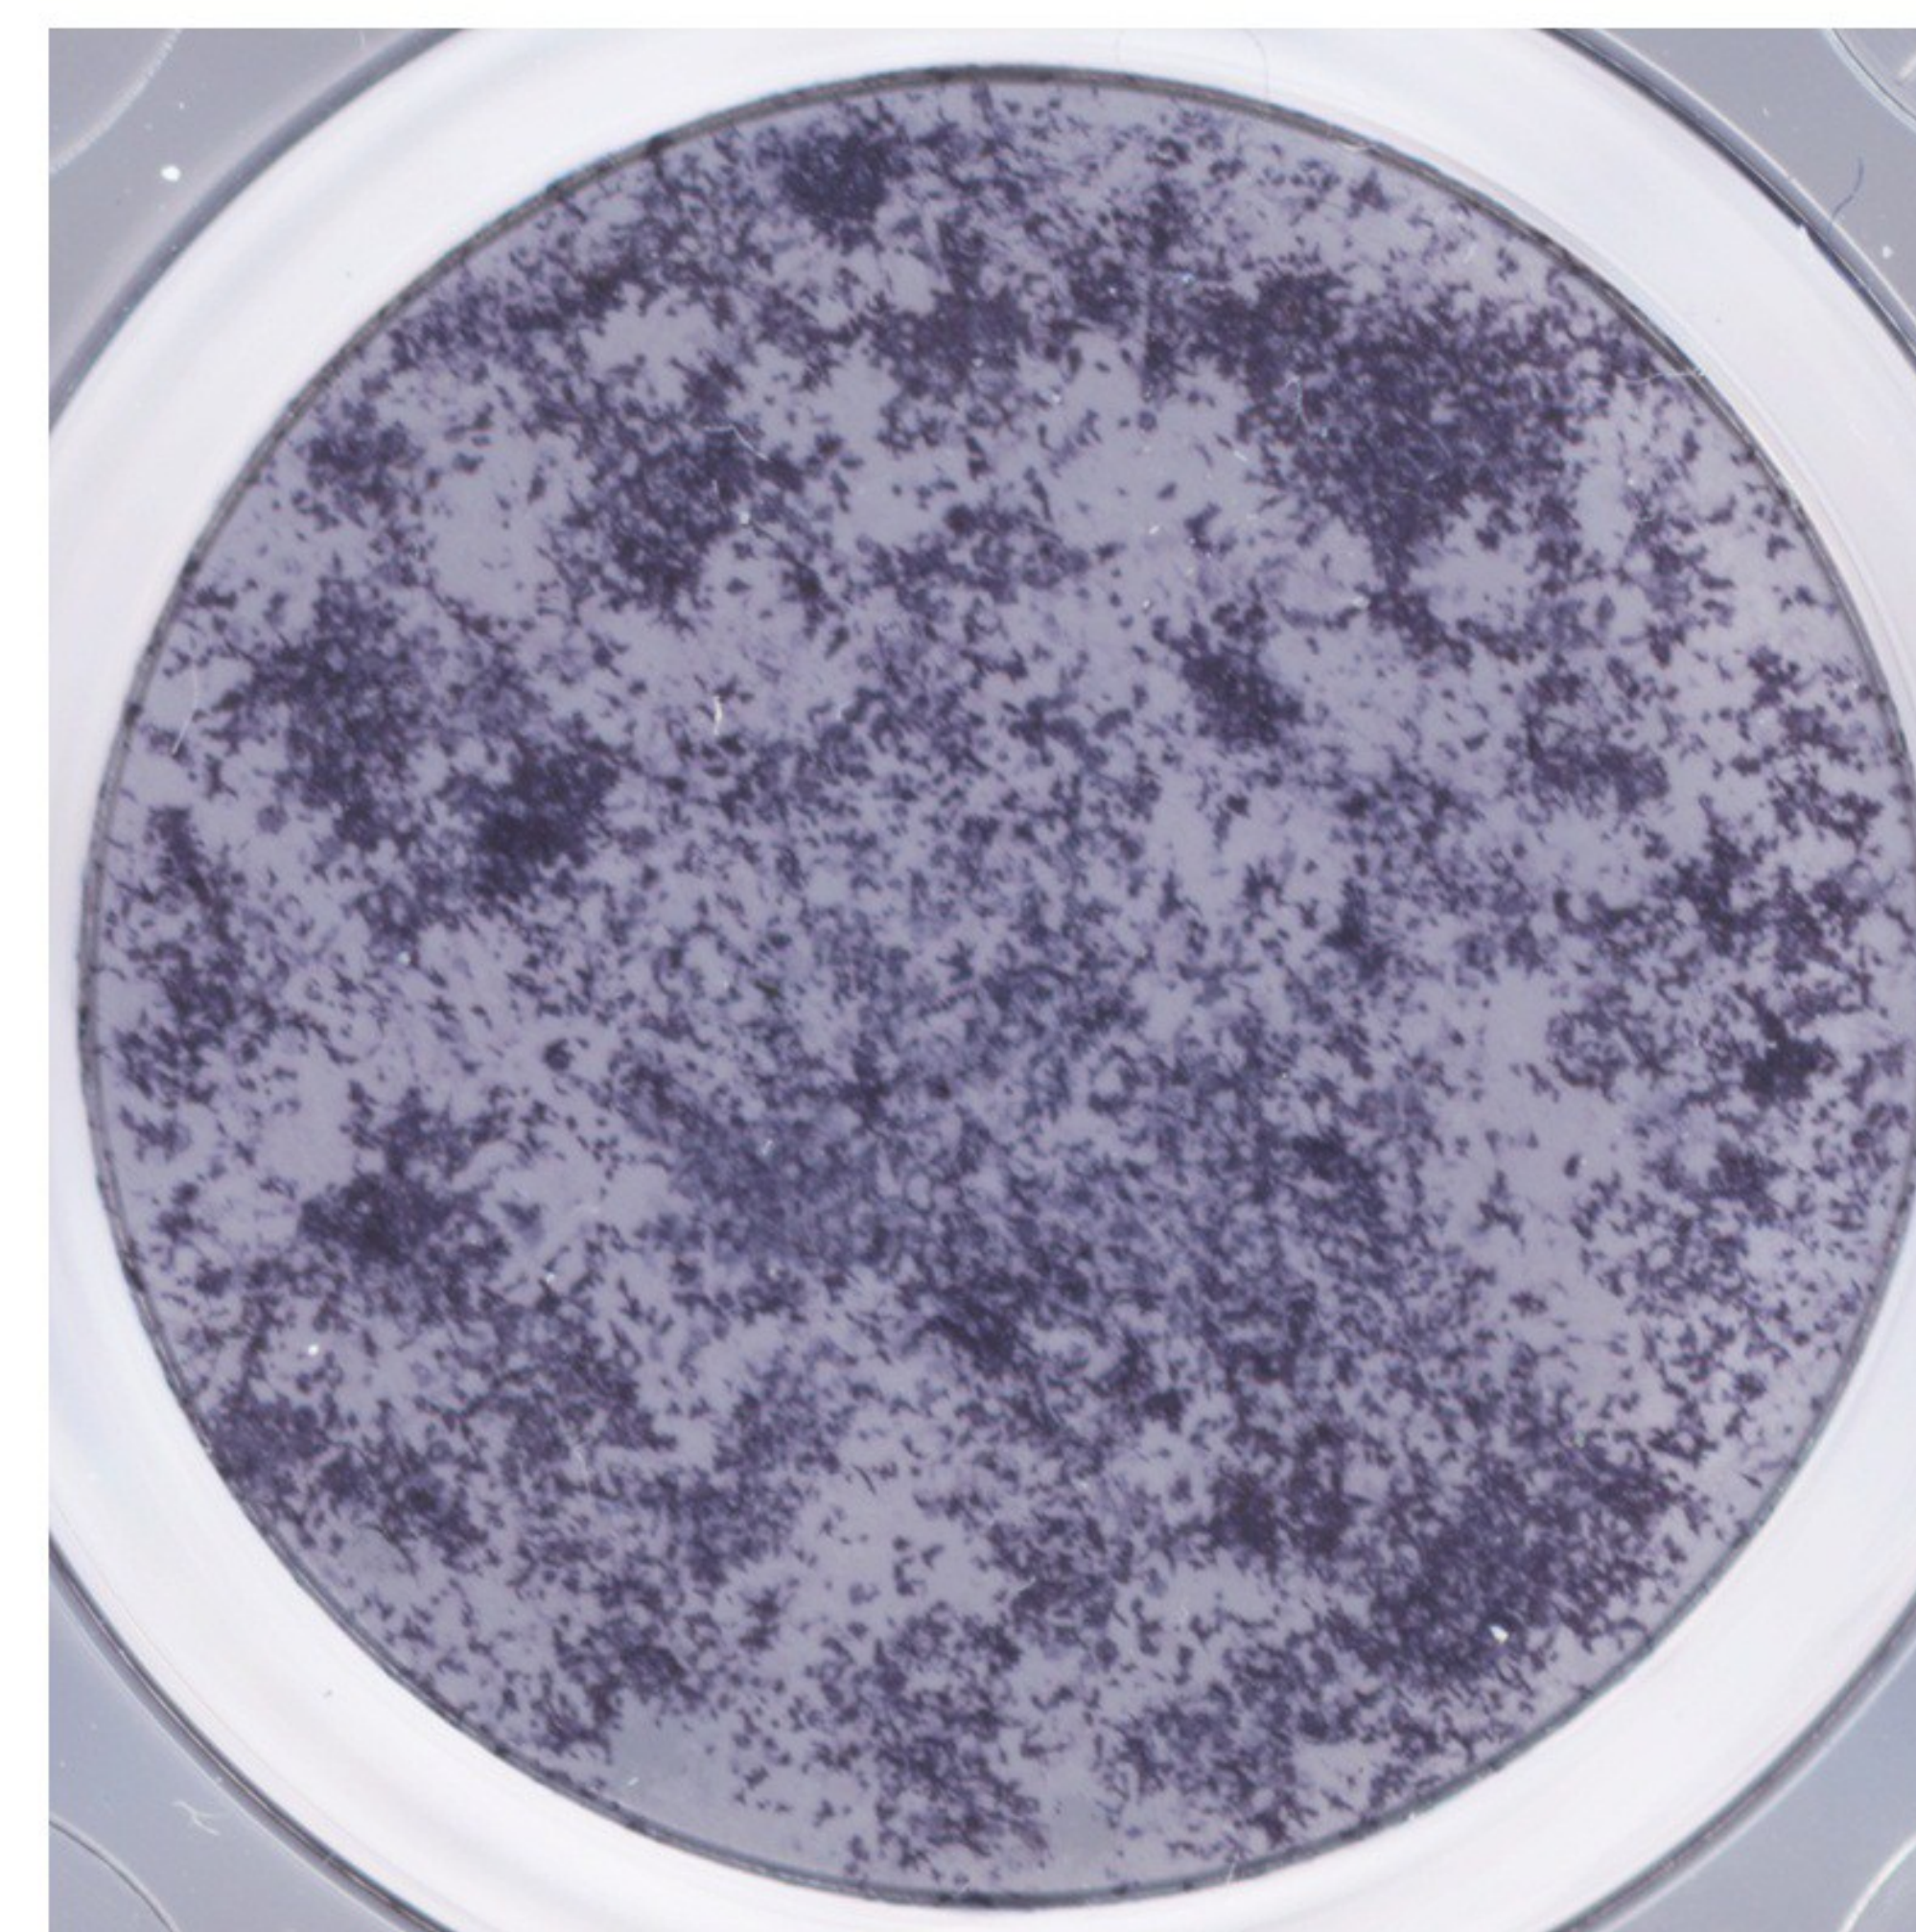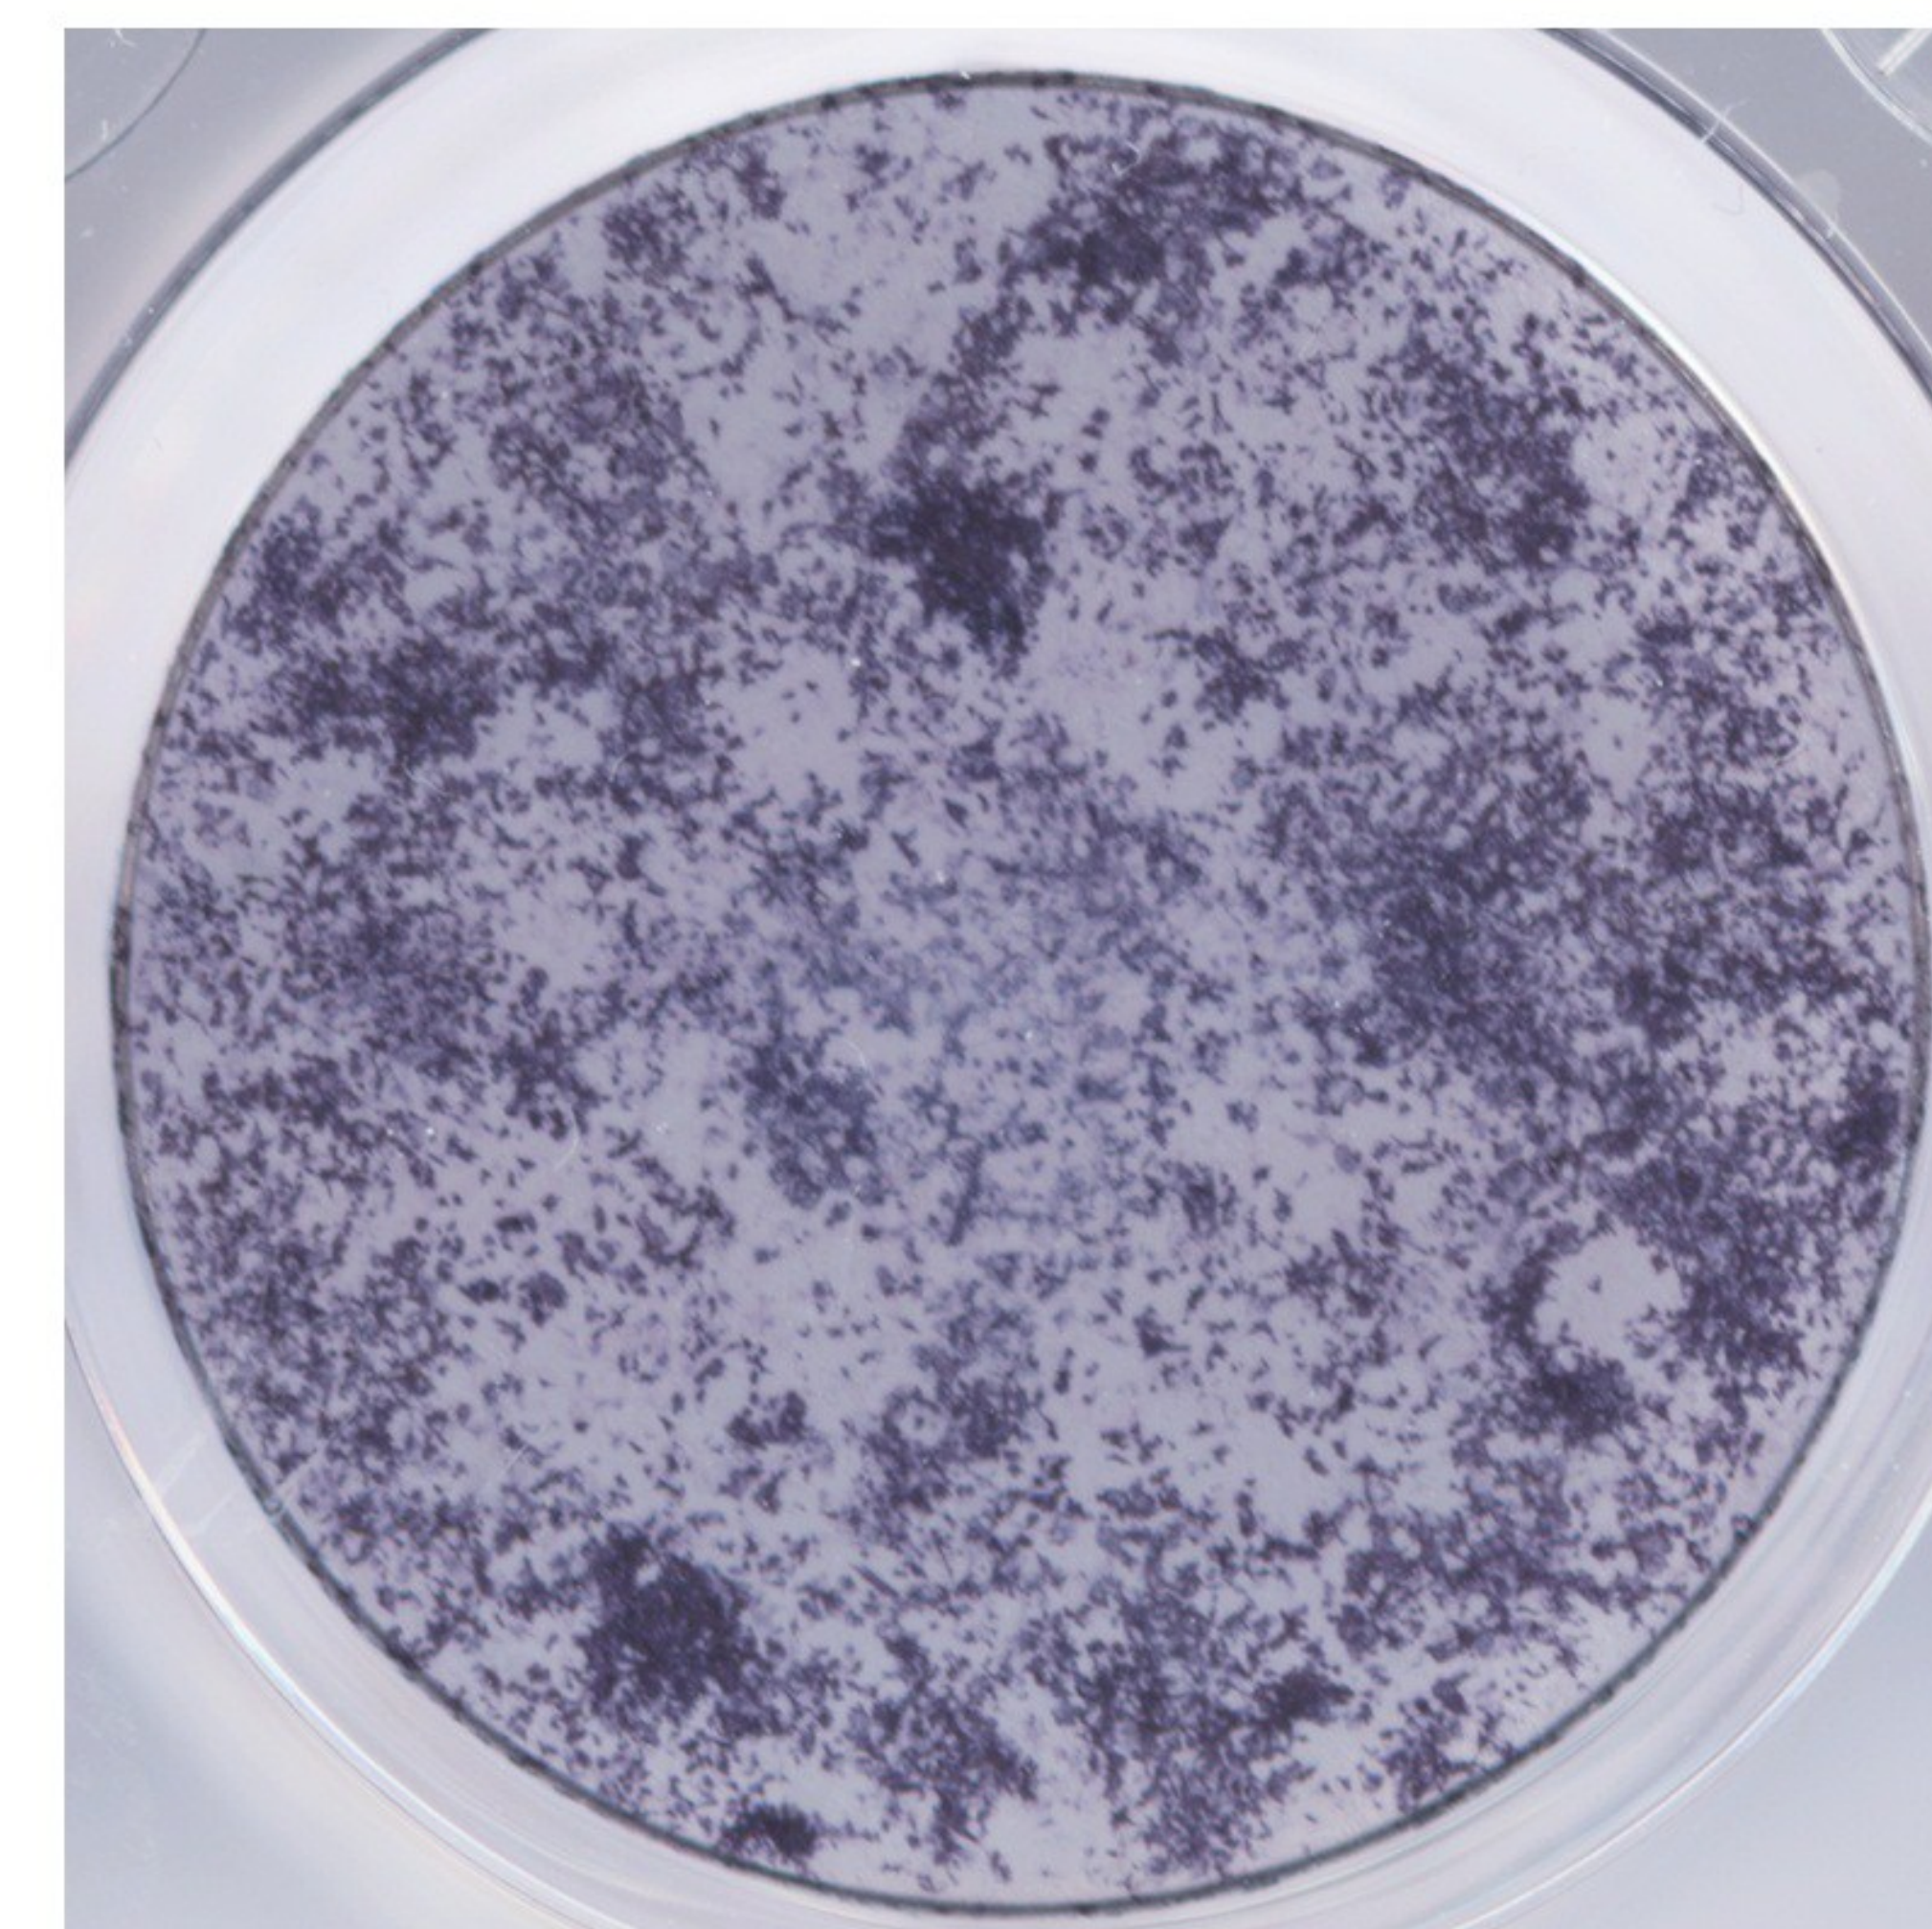

Supplement: c9fo00206e2.pdf [file c9fo00206e2.pdf]
